# Supplementary material for: Adenovirus vaccine targeting kinases induces potent antitumor immunity in solid tumors
Source: PubMed Central journal article supplement — J Immunother Cancer. 2024 Aug 28;12(8):e009869. doi: 10.1136/jitc-2024-009869 (PMC11367354; doi:10.1136/jitc-2024-009869), 2024-08-28
Supplement: jitc-12-8-s001.pdf [file jitc-12-8-s001.pdf]

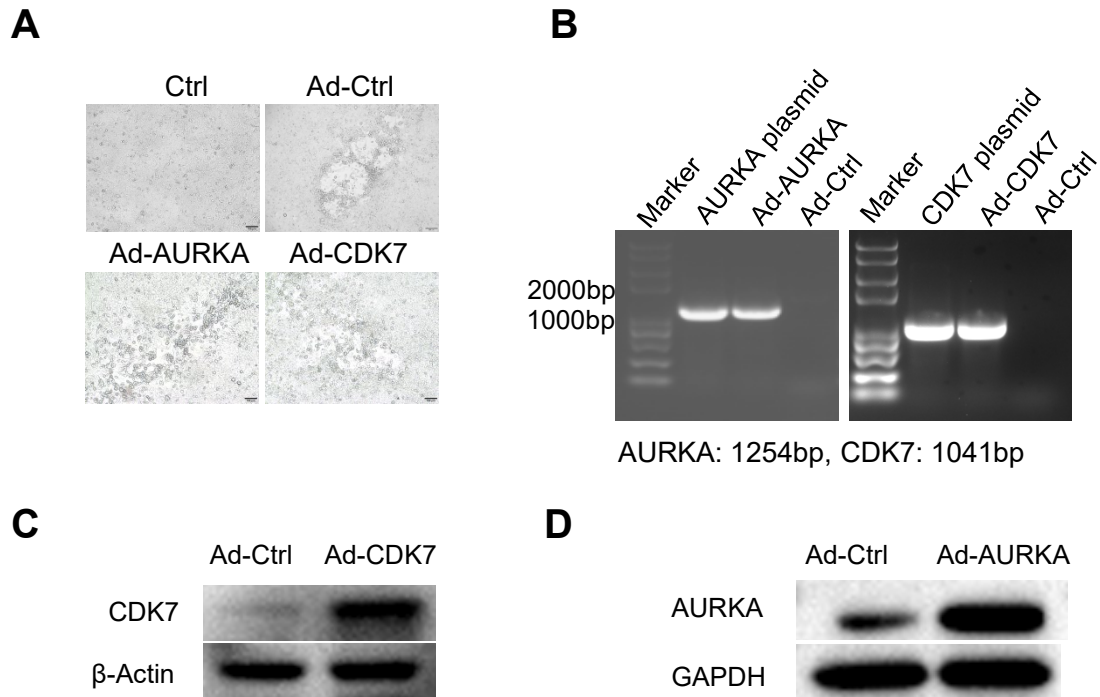

**Figure S1** Preparation and verification of Ad-AURKA or Ad-CDK7 vaccine. (A) Plaques represent the success of packaging Ads, encompassing Ad-Ctrl, Ad-AURKA, and Ad-CDK7. (B) The presence of successfully packaged Ad-AURKA/CDK7 in the virus supernatant was verified through virus gene PCR. (C, D). Western blot confirmed the expression of Ad-AURKA or Ad-CDK7 proteins.

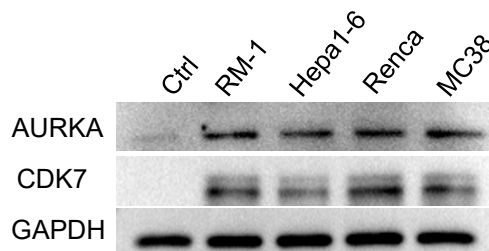

**Figure S2** Expression of AURKA and CDK7 in various tumor cell lines. The expression of AURKA or CDK7 was detected by Western blot in normal muscle tissue (Ctrl), RM-1, Hepa1-6, Renca, and MC38 cell lines.

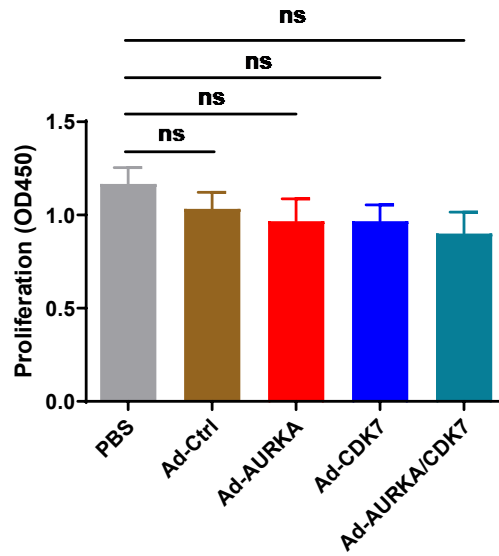

**Figure S3** The proliferation of Renca cells infected with Ad vaccine in vitro. Renca cells were plated into 96-well plates at a density of  $3 \times 10^3$  cells/well, and infected with Ad-Ctrl, Ad-AURKA, Ad-CDK7, and Ad-AURKA/CDK7 respectively, PBS as a control. The infected cells were cultured at 37 °C for 72 h. CCK-8 kit was used to measure the cell proliferation. Data are shown as means  $\pm$  SD. The different significance was no significant (ns).

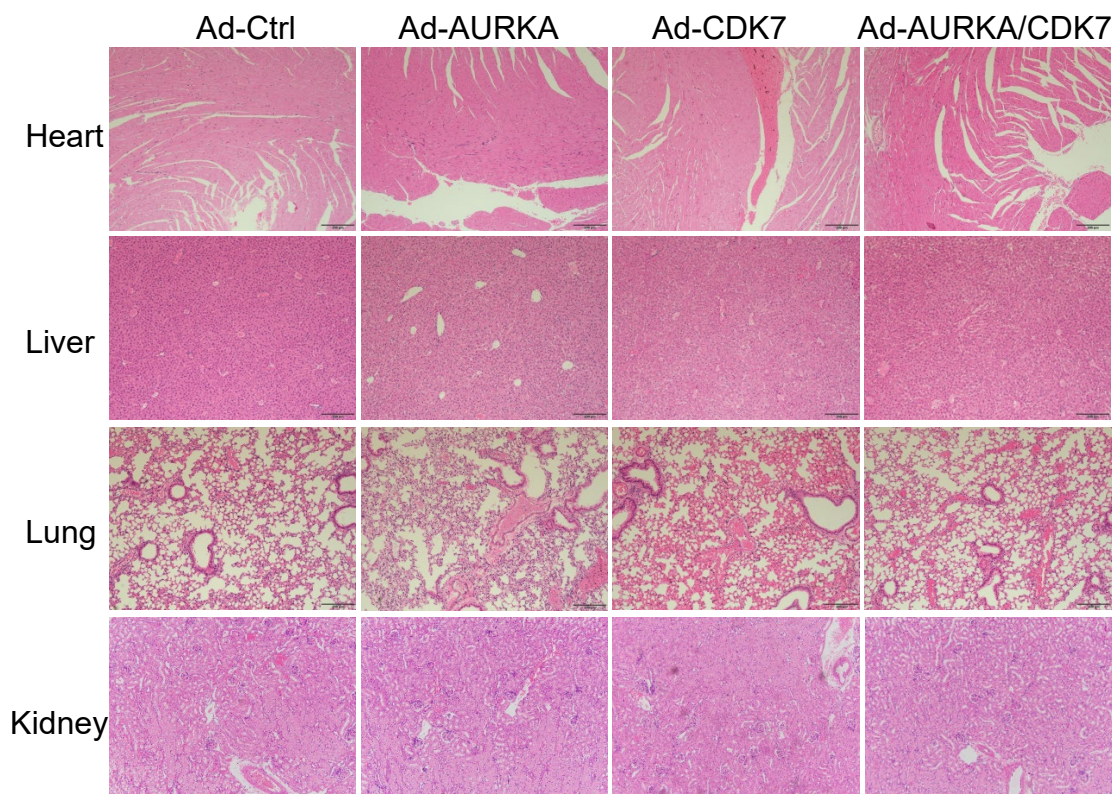

**Figure S4** The safety of the Ad-AURKA/CDK7 vaccine verified by HE staining. The safety and absence of toxic side effects associated with the Ad-AURKA/CDK7 vaccine were evaluated in the heart, liver, lung, and kidney tissues using HE staining.

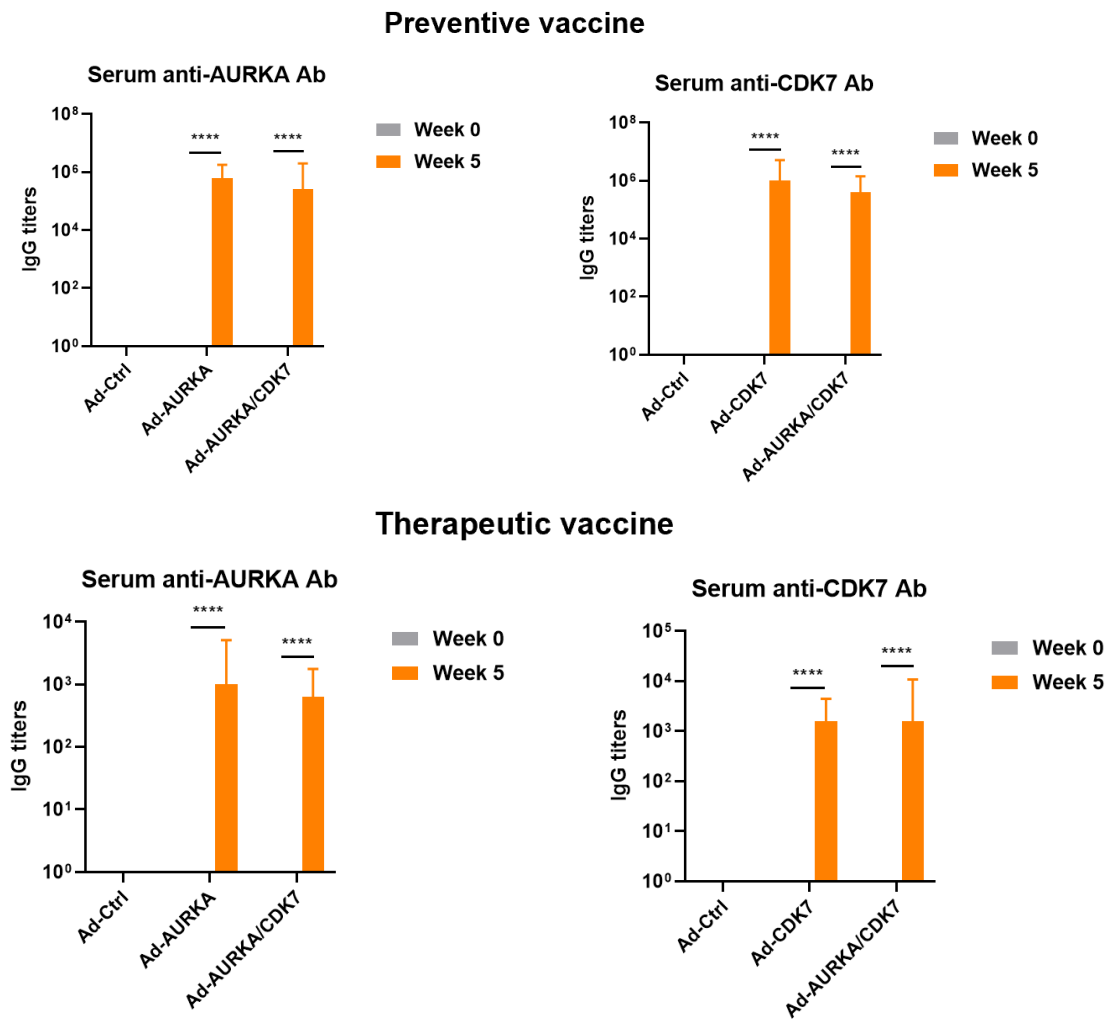

**Figure S5** Serum IgG antibodies induced by Ad vaccines. Mice were immunized 3 times with preventive or therapeutic vaccines at 10-day intervals (on days 0, 10, 20). Serum IgG antibodies against AURKA or CDK7 were detected by ELISA. AURKA or CDK7 antibody titers were determined at week 0 or week 5; Data are presented as the mean  $\pm$  SD (n = 5). The statistical significance levels were set as \*\*\*\*P < 0.0001.

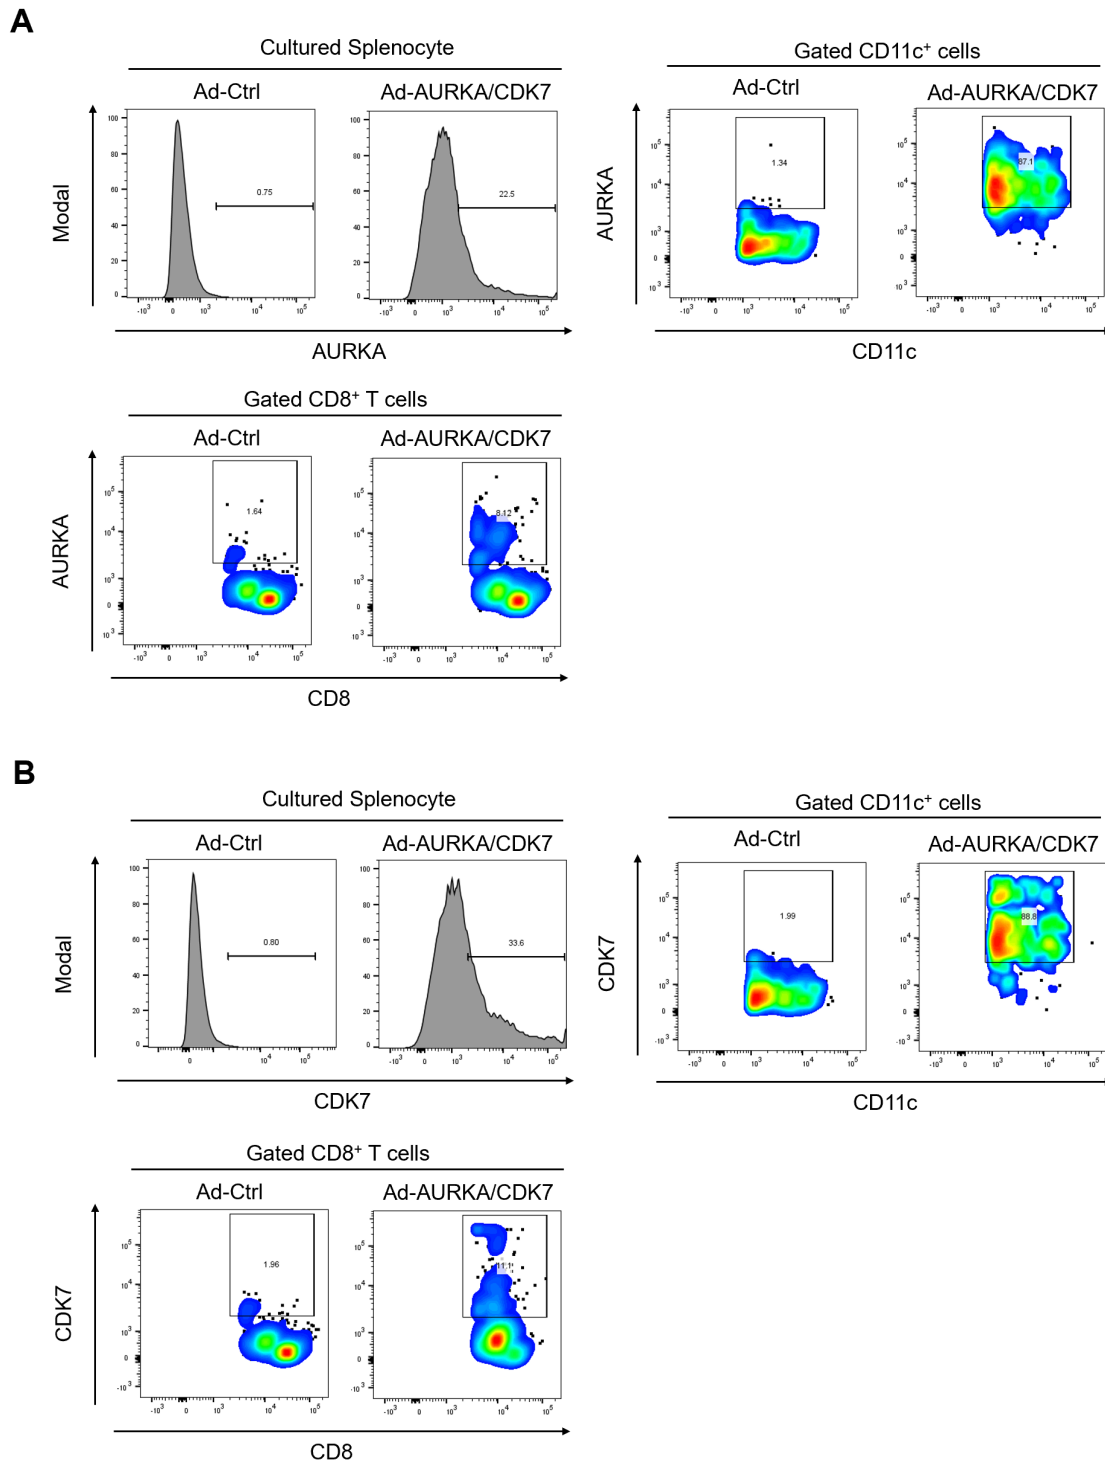

**Figure S6** The expression of AURKA and CDK7 in infected splenocytes, DCs, and CD8<sup>+</sup> T cells with Ad-AURKA/CDK7 vaccine in vitro. Lymphocytes were cultured in the medium containing IL-2 (50 U/ml) infected with Ad-AURKA/CDK7 and then inoculated on 48-well flat plates at a density of  $1 \times$

10<sup>6</sup> cells per well. The plates were placed in a constant temperature incubator at 37 °C for 3 days. The expression of AURKA and CDK7 in infected splenocytes, DCs, and CD8<sup>+</sup> T cells was analyzed by flow cytometry.
