# Supplementary figures and images for: Adenovirus vaccine targeting kinases induces potent antitumor immunity in solid tumors
Source: PubMed Central journal article supplement — J Immunother Cancer. 2024 Aug 28;12(8):e009869. doi: 10.1136/jitc-2024-009869 (PMC11367354; doi:10.1136/jitc-2024-009869), 2024-08-28

Virus package:

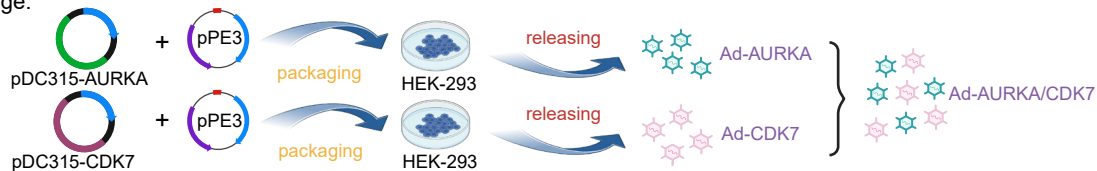

In vivo:

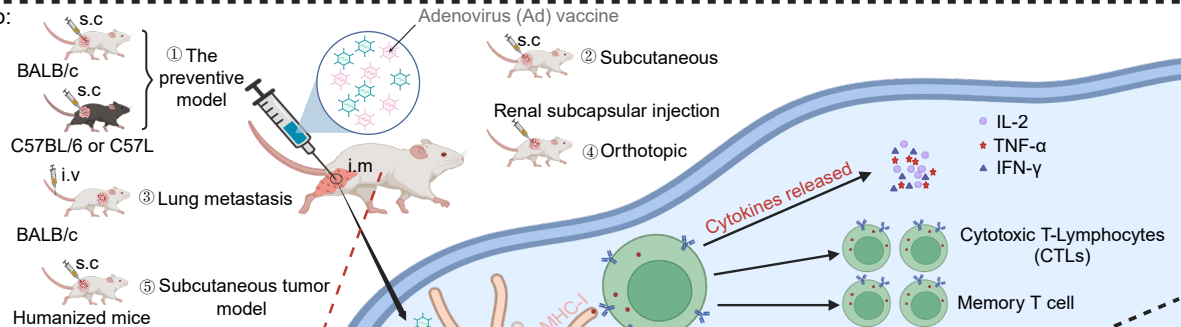

In vitro:

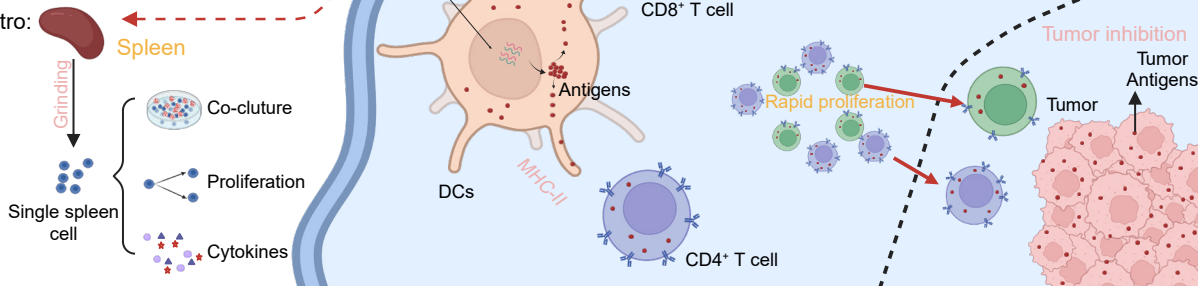

Supplement: jitc-12-8-s002.pdf [file jitc-12-8-s002.pdf]
